# Supplementary material for: Metabolomic Response throughout 16 Weeks of Combined Aerobic and Resistance Exercise Training in Older Women with Metabolic Syndrome
Source: MDPI journal article supplement (doi:10.3390/metabo12111041), 2022-10-30
Supplement: s1 [file s1]

## Supplementary material

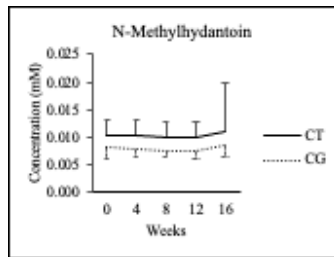

**Figure S1.** Class of identified organic carbonic acid and its concentration in mM.

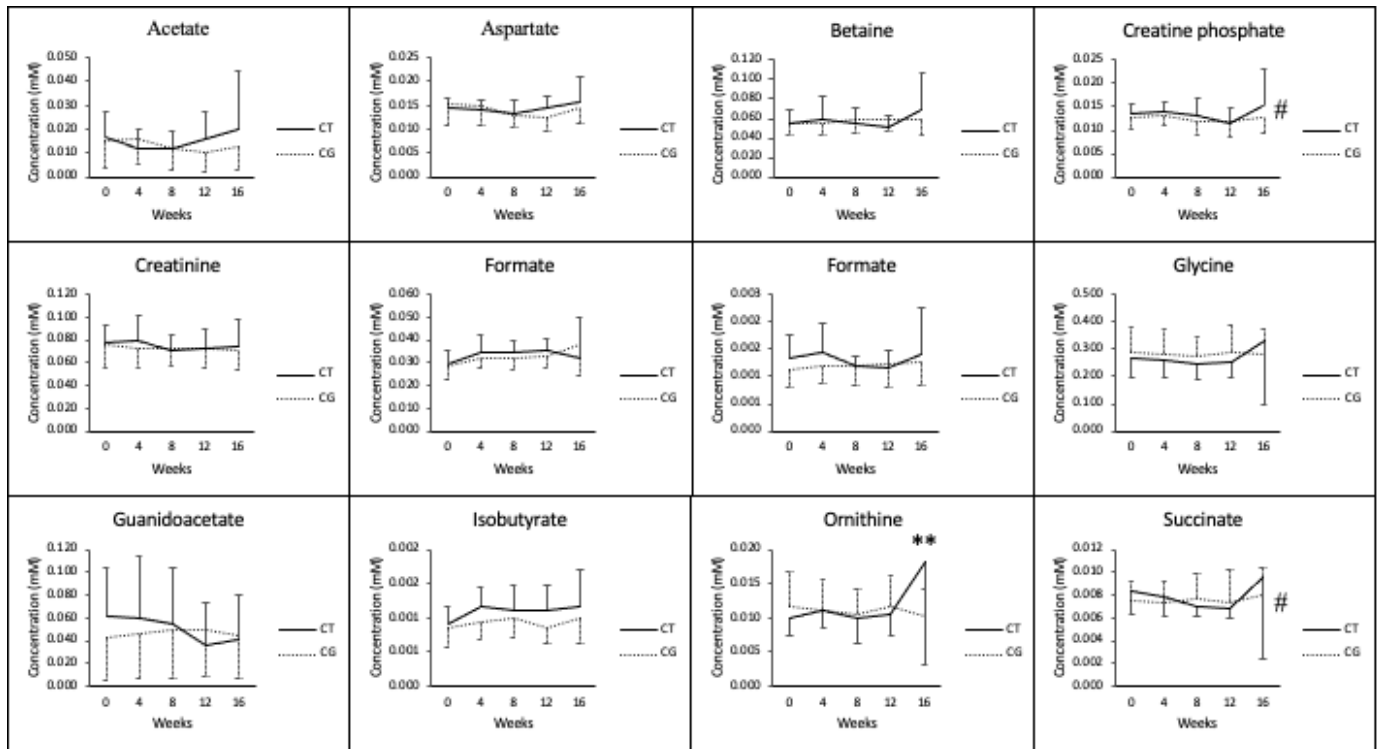

**Figure S2.** Class of identified carboxylic acids and their concentrations in mM. \*\* significantly different from 0W, 4W, 8W and 12W within CT ( $P \leq 0.05$ ); #: significant time-effect ( $P \leq 0.05$ ).

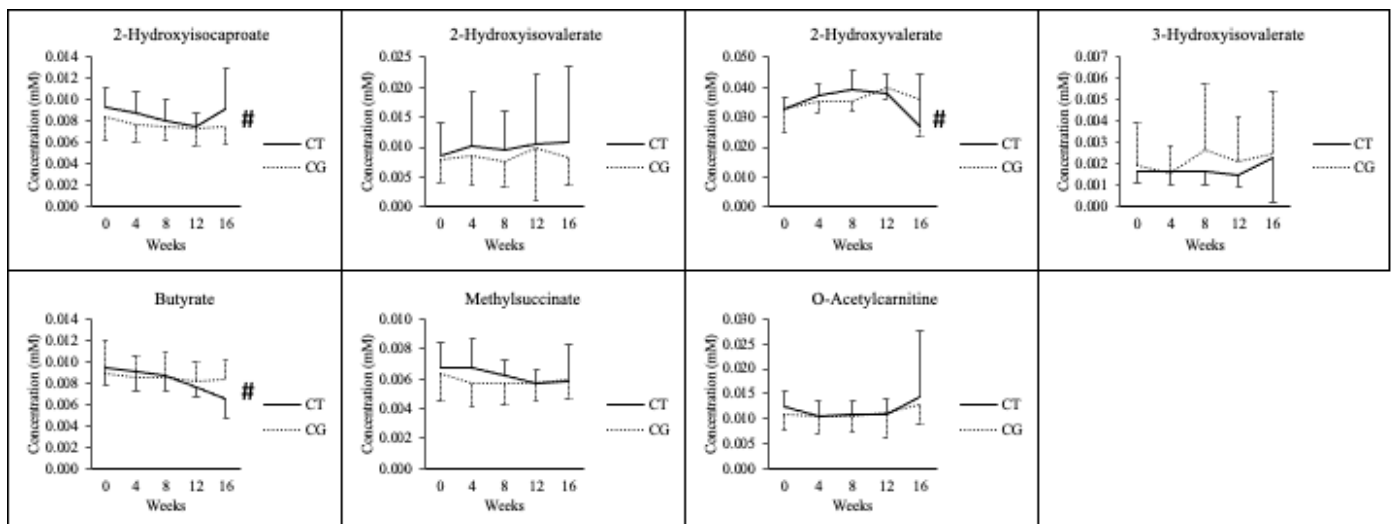

**Figure S3.** Class of identified fatty acids and their concentrations in mM. #: significant time-effect ( $P \leq 0.05$ ).

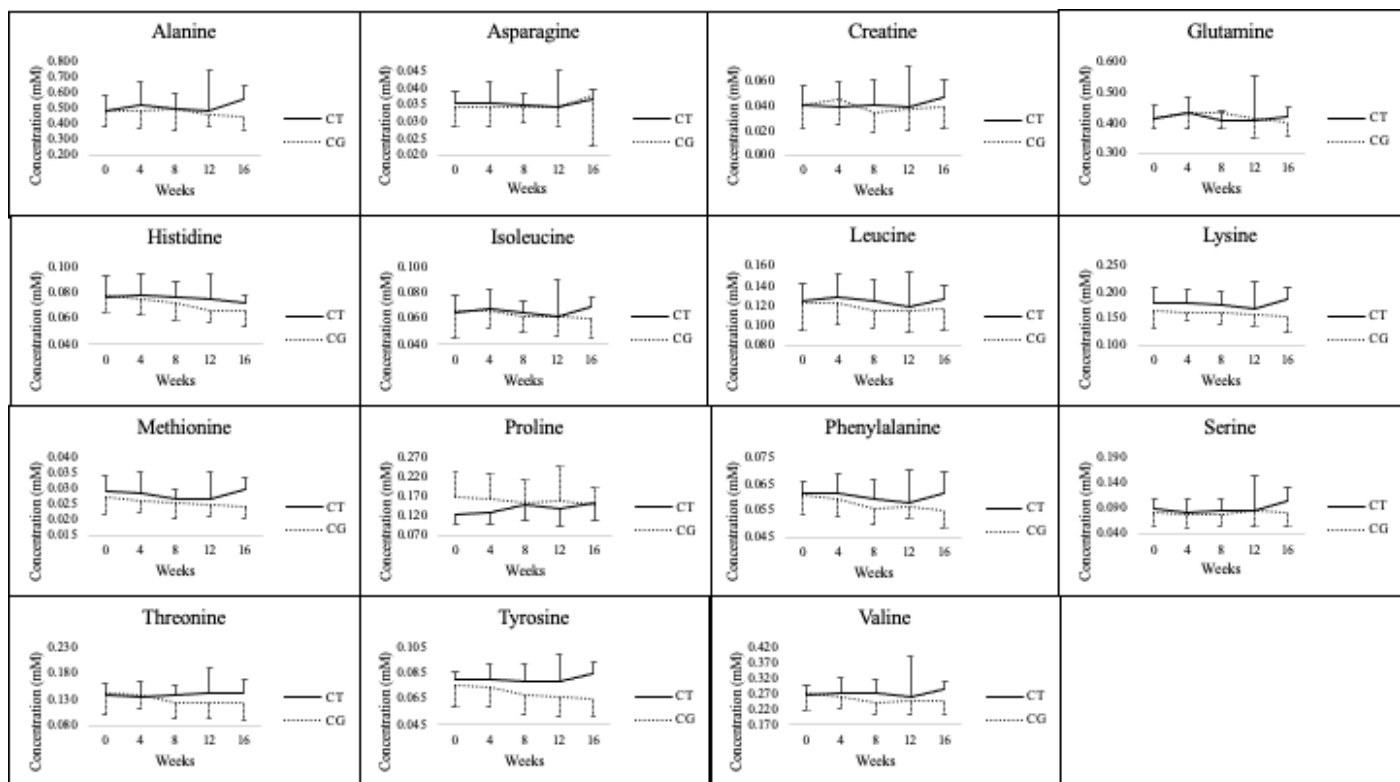

**Figure S4.** Class of identified amino acids and their concentrations in mM.

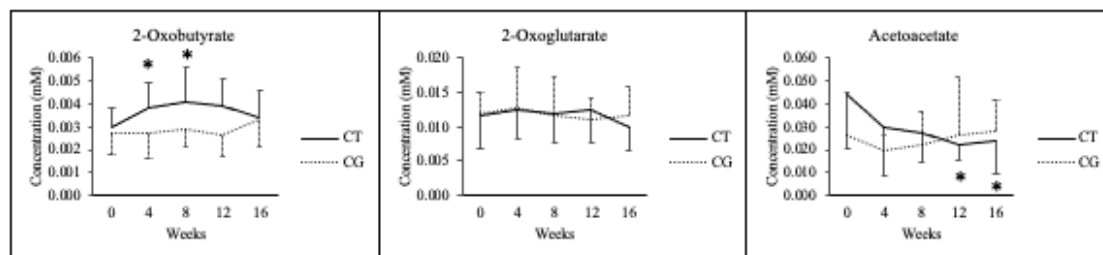

**Figure S5.** Class of identified keto acids and their concentrations in mM. \*: significantly different from 0W within CT ( $P \leq 0.05$ ).

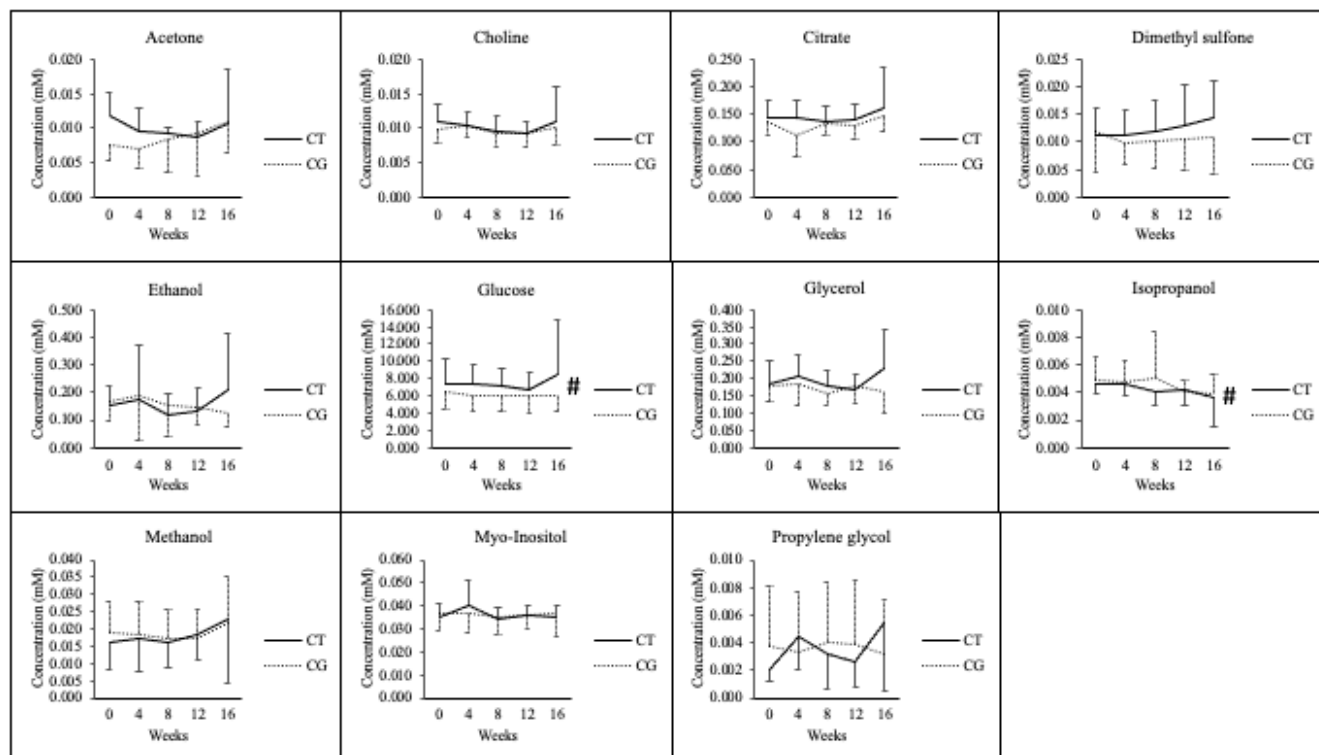

**Figure S6.** Class of identified organic oxygen compounds and their concentrations in mM. #: significant time-effect ( $P \leq 0.05$ ).

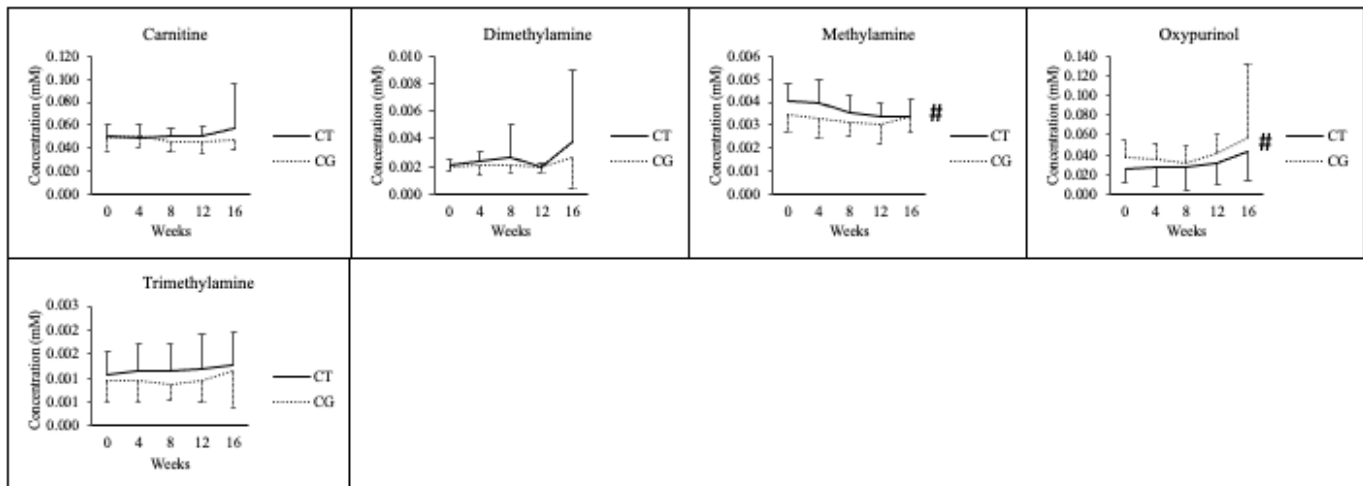

**Figure S7.** Class of identified organic nitrogen compounds and their concentrations in mM. #: significant time-effect ( $P \leq 0.05$ ).

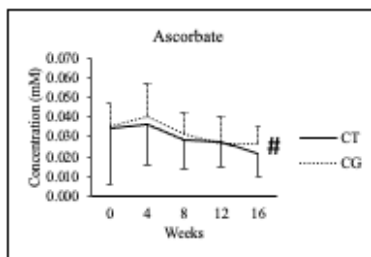

**Figure S8.** Class of identified dihydrofuran and its concentrations in mM. #: significant time-effect ( $P \leq 0.05$ ).

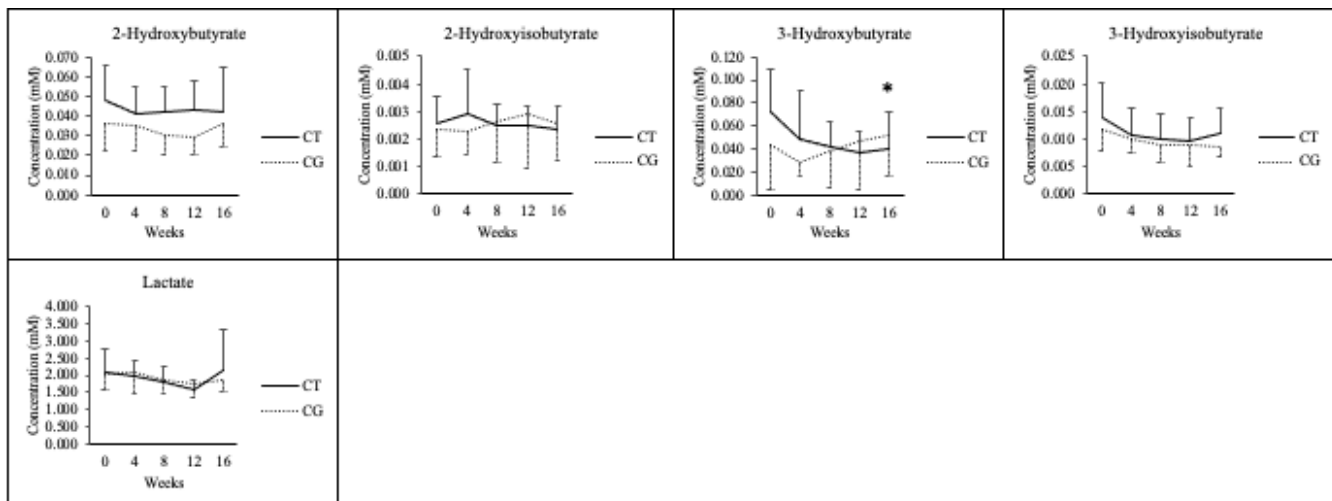

**Figure S9.** Class of identified hydroxy acids and their concentrations in mM. \*: significantly different from 0W within CT ( $P \leq 0.05$ ).

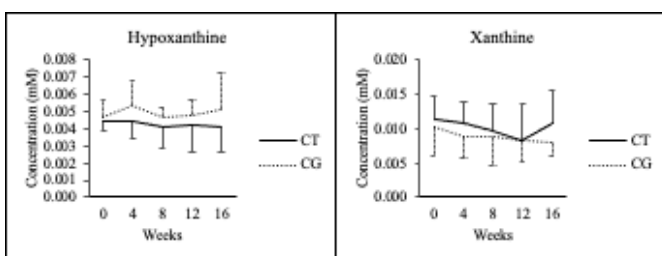

**Figure S10.** Class of identified imidazopyridines and their concentrations in mM.

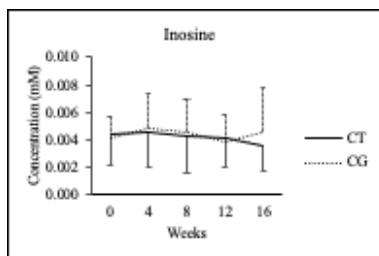

**Figure S11.** Class of identified purine nucleotides and their concentrations in mM.

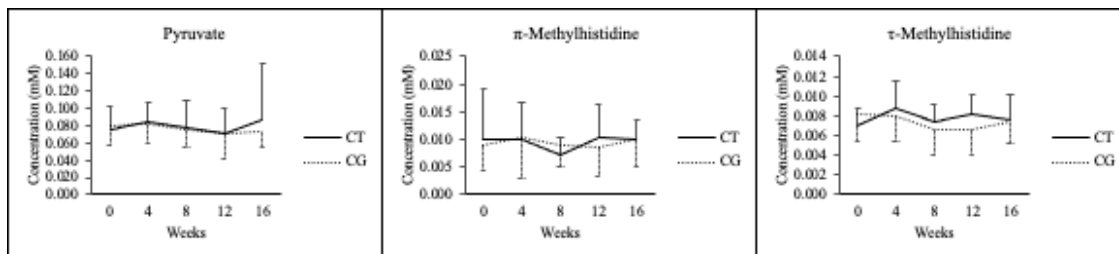

**Figure S12.** Classes not shown, identified and their concentrations in mM.
